# Supplementary material for: Intraoperative Wound Irrigation for the Prevention of Surgical Site Infection After Laparotomy: A Randomized Clinical Trial by CHIR-Net
Source: PubMed Central journal article supplement (PMC10882507; doi:10.1001/jamasurg.2023.7985), 2024-02-21
Supplement: jamasurg-e237985-s002.pdf [file jamasurg-e237985-s002.pdf]

## Supplemental Online Content

Mueller TC, Kehl V, Dimpel R, et al; the IOWISI study group. Intraoperative wound irrigation for the prevention of surgical site infection after laparotomy: a randomized clinical trial by CHIR-Net. *JAMA Surg*. Published online February 21, 2024. doi:10.1001/jamasurg.2023.7985

**eAppendix 1.** CDC classification of intraoperative Level of Contamination (LOC)

**eAppendix 2.** CDC classification of Surgical Site Infection (SSI)

**eTable 1.** Sensitivity analysis of the primary endpoint with the subdistributional hazard model of Fine and Gray with SSI as main event, re-laparotomy and death as competing risks, treatment group, and several patient characteristics as covariates

**eTable 2.** Analysis of the primary endpoint with the subdistributional hazard model of Fine and Gray with SSI as main event and relaparotomy and death as competing risks, and treatment group, level of contamination, BMI class, cardiovascular, and pulmonary comorbidities as covariates

**eTable 3.** Frequency, severity, causal relationship, and types of serious adverse events for the wound irrigation groups PHX, saline, and no irrigation

**eTable 4.** Clavien–Dindo classification of surgical complications (including SSI I-III) in the IOWISI trial by study group

This supplemental material has been provided by the authors to give readers additional information about their work.

## eAppendix. 1 CDC classification of intraoperative Level of Contamination (LOC)

| LOC                                 | Criteria                                                                                                                                                                                                                                      | SSI rates* |
|-------------------------------------|-----------------------------------------------------------------------------------------------------------------------------------------------------------------------------------------------------------------------------------------------|------------|
| <b>Level I/ Clean</b>               | -uninfected operative wounds<br>-no inflammation is encountered<br>-the respiratory, alimentary, genital, or uninfected urinary tracts are <b>not</b> entered                                                                                 | 1-5%       |
| <b>Level II/ Clean-contaminated</b> | -the respiratory, alimentary, genital, or urinary tracts are entered under controlled conditions and without unusual contamination<br>-no evidence of infection or major break in technique is encountered                                    | 3-11%      |
| <b>Level III/ Contaminated</b>      | -operations with major breaks in sterile technique or gross spillage from gastrointestinal tract<br>-incisions in which acute, non-purulent inflammation is encountered<br>-outside object had contact with wound (e.g., bullet, knife blade) | 10-17%     |
| <b>Level IV/ Dirty-infected</b>     | - existing clinical infection<br>-perforated viscera<br>-foreign object lodged in wound<br>-any wound that has been exposed to pus or fecal matter                                                                                            | >27%       |

\*according to Reeves N, Torkington J. *Prevention of surgical site infections. Surgery (Oxford). 2022;40(1):20-4.*

## eAppendix. 2 CDC classification of Surgical Site Infection (SSI)

---

| <b>Infection occurs within 30 days after the operation ...</b>   |                                                                                                                                                                                                                                                                                                                                                                                                                                                                                                                                                                                                                                                                                                                                   |
|------------------------------------------------------------------|-----------------------------------------------------------------------------------------------------------------------------------------------------------------------------------------------------------------------------------------------------------------------------------------------------------------------------------------------------------------------------------------------------------------------------------------------------------------------------------------------------------------------------------------------------------------------------------------------------------------------------------------------------------------------------------------------------------------------------------|
| <b>Superficial incisional SSI (class I)</b>                      | <b>...and infection involves only skin or subcutaneous tissue and at least <i>one</i> of the following:</b> <ol style="list-style-type: none"><li>1 Purulent drainage from the superficial incision</li><li>2 Organisms isolated from an aseptically obtained culture of fluid or tissue from the superficial incision</li><li>3 At least one of the following signs or symptoms of infection: pain or tenderness, localized swelling, redness, or heat <i>and</i> superficial incision is deliberately opened by surgeon, <i>unless</i> incision is culture negative</li></ol>                                                                                                                                                   |
| <b>Deep incisional SSI (class II)</b>                            | <b>...and infection involves deep soft tissues (fascial and muscle layers) and at least <i>one</i> of the following:</b> <ol style="list-style-type: none"><li>1 Purulent drainage from the deep incision but not from the organ/space component of the surgical site</li><li>2 A deep incision spontaneously dehisces or is deliberately opened by a surgeon</li><li>3 And at least one of the following symptoms: fever (&gt;38°C), localized pain, or tenderness of the incision area <i>unless</i> incision is culture negative</li><li>4 An abscess or other evidence of infection involving the deep incision is found on direct examination, during reoperation, or by histopathologic or radiologic examination</li></ol> |
| <b>Organ/space SSI (class III)</b>                               | <b>...and infection involves any part of the anatomy (e.g., organs or spaces), other than the incision, which was opened or manipulated during an operation and at least <i>one</i> of the following:</b> <ol style="list-style-type: none"><li>1 Purulent drainage from a drain that is placed through a stab wound into the organ/space</li><li>2 Organisms isolated from an aseptically obtained culture of fluid or tissue in the organ/space</li></ol>                                                                                                                                                                                                                                                                       |
| <b>...or the infection is diagnosed by the attending surgeon</b> |                                                                                                                                                                                                                                                                                                                                                                                                                                                                                                                                                                                                                                                                                                                                   |

---

**eTable 1. Sensitivity analysis of the primary endpoint with the subdistributional hazard model of Fine and Gray with SSI as main event, re-laparotomy and death as competing risks, treatment group, and several patient characteristics as covariates**

|                                        | 95%CI for HR |       |       |         |
|----------------------------------------|--------------|-------|-------|---------|
|                                        | HR           | Lower | Upper | P-value |
| <i>Treatment group</i>                 |              |       |       | 0.833   |
| (Test 1) No irrigation vs. PHX         | 1.123        | 0.579 | 2.175 | 0.732   |
| (Test 2) Saline vs. PHX                | 1.167        | 0.701 | 1.945 | 0.552   |
| <i>Level of contamination</i>          |              |       |       |         |
| III/IV vs. I/II                        | 1.396        | 0.565 | 3.450 | 0.469   |
| <i>BMI class</i>                       |              |       |       | 0.780   |
| 18.5 ≤ BMI < 25 (vs. BMI < 18.5)       | 1.339        | 0.371 | 4.830 | 0.656   |
| 25 ≤ BMI < 30 (vs. BMI < 18.5)         | 1.075        | 0.290 | 3.985 | 0.914   |
| 30 ≤ BMI (vs. BMI < 18.5)              | 1.022        | 0.260 | 4.012 | 0.975   |
| <i>Diabetes</i>                        |              |       |       |         |
| Yes vs. no                             | 0.836        | 0.449 | 1.556 | 0.572   |
| <i>NNIS risk score</i>                 | 1.019        | 0.735 | 1.413 | 0.910   |
| <i>Type of surgery</i>                 |              |       |       | 0.267   |
| HBP vs. colorectal                     | 0.564        | 0.284 | 1.121 | 0.102   |
| Upper GI vs. colorectal                | 0.559        | 0.253 | 1.235 | 0.151   |
| Other vs. colorectal                   | 0.284        | 0.037 | 2.148 | 0.223   |
| <i>Duration of surgery (min)</i>       | 1.001        | 0.999 | 1.003 | 0.205   |
| <i>Intraoperative change of gloves</i> |              |       |       |         |
| Yes vs. no                             | 1.076        | 0.637 | 1.818 | 0.783   |
| <i>Use of wound edge protectors</i>    |              |       |       |         |
| Yes vs. no                             | 1.094        | 0.635 | 1.887 | 0.746   |
| <i>Enterostomy created</i>             |              |       |       |         |
| Yes vs. no                             | 1.975        | 0.913 | 4.274 | 0.084   |

**Abbreviations:** PHX = Polyhexanide; BMI = body mass index; CI = Confidence interval; HR = Hazard ratio; HBP = hepatobiliary-pancreatic, GI = Gastrointestinal, NNIS = National Nosocomial Infections Surveillance

**eTable 2. Analysis of the primary endpoint with the subdistributional hazard model of Fine and Gray with SSI as main event and relaparotomy and death as competing risks, and treatment group, level of contamination, BMI class, cardiovascular, and pulmonary comorbidities as covariates**

|                                   | HR    | 95%CI for HR |       | P-value |
|-----------------------------------|-------|--------------|-------|---------|
|                                   |       | Lower        | Upper |         |
| <i>Treatment group</i>            |       |              |       |         |
|                                   |       |              |       | 0.714   |
| (Test 1) No irrigation vs. PHX    | 1.236 | 0.635        | 2.404 | 0.533   |
| (Test 2) Saline vs. PHX           | 1.201 | 0.740        | 1.950 | 0.458   |
| <i>Level of contamination</i>     |       |              |       |         |
| III/IV vs. I/II                   | 1.660 | 0.772        | 3.571 | 0.194   |
| <i>BMI class</i>                  |       |              |       |         |
|                                   |       |              |       | 0.829   |
| 18.5 ≤ BMI < 25 (vs. BMI < 18.5)  | 1.456 | 0.367        | 5.771 | 0.593   |
| 25 ≤ BMI < 30 (vs. BMI < 18.5)    | 1.197 | 0.305        | 4.699 | 0.797   |
| 30 ≤ BMI (vs. BMI < 18.5)         | 1.170 | 0.285        | 4.797 | 0.827   |
| <i>Cardiovascular comorbidity</i> |       |              |       |         |
|                                   |       |              |       | 0.562   |
| Current (vs. none)                | 1.007 | 0.651        | 1.559 | 0.975   |
| Previous (vs. none)               | 0.343 | 0.048        | 2.452 | 0.286   |
| <i>Pulmonary comorbidity</i>      |       |              |       |         |
|                                   |       |              |       | 0.145   |
| Current (vs. none)                | 0.829 | 0.385        | 1.782 | 0.630   |
| Previous (vs. none)               | 2.135 | 0.966        | 4.718 | 0.061   |

**Abbreviations:** PHX = Polyhexanide; BMI = body mass index; CI = Confidence interval; HR = Hazard ratio

**eTable 3. Frequency, severity, causal relationship, and types of serious adverse events for the wound irrigation groups PHX, saline, and no irrigation**

|                                                               | <i>Exposed to<br/>PHX n=291</i> |          |            | <i>Exposed to<br/>Saline n=295</i> |          |            | <i>Exposed to<br/>No irrigation n=103</i> |          |            | <i>P-value<br/>&amp;</i> |
|---------------------------------------------------------------|---------------------------------|----------|------------|------------------------------------|----------|------------|-------------------------------------------|----------|------------|--------------------------|
|                                                               | <i>Subjects<br/>affected</i>    |          |            | <i>Subjects<br/>affected</i>       |          |            | <i>Subjects<br/>affected</i>              |          |            |                          |
|                                                               | <i>Events</i>                   | <i>n</i> | <i>(%)</i> | <i>Events</i>                      | <i>n</i> | <i>(%)</i> | <i>Events</i>                             | <i>n</i> | <i>(%)</i> |                          |
|                                                               |                                 |          |            | 177                                |          |            |                                           | 4        | (40)       |                          |
| <b>SAE</b>                                                    | 178 (100)                       | 95       | (33)       | (100)                              | 104      | (35)       | 63 (100)                                  | 1        | )          | 0·232                    |
| <b>Severity (n, % #)</b>                                      |                                 |          |            |                                    |          |            |                                           |          |            | 0·031                    |
| <i>Mild</i>                                                   | 17 (9·6)                        | ..       | ..         | 9 (5·1)                            | ..       | ..         | 7 (11·1)                                  | ..       | ..         | ..                       |
| <i>Moderate</i>                                               | 48 (27·0)                       | ..       | ..         | 54<br>(30·5)                       | ..       | ..         | 14<br>(22·2)                              | ..       | ..         | ..                       |
| <i>Severe</i>                                                 | 58 (32·6)                       | ..       | ..         | 65<br>(36·7)                       | ..       | ..         | 28<br>(44·4)                              | ..       | ..         | ..                       |
| <i>Life-threatening</i>                                       | 47 (26·4)                       | ..       | ..         | 32<br>(18·1)                       | ..       | ..         | 8 (12·7)                                  | ..       | ..         | ..                       |
| <i>Death</i>                                                  | 8 (4·5)                         | ..       | ..         | 17 (9·6)                           | ..       | ..         | 6 (9·5)                                   | ..       | ..         | ..                       |
| <b>Causal relationship (n, % #)</b>                           |                                 |          |            |                                    |          |            |                                           |          |            | 0·709 §                  |
| <i>Unrelated</i>                                              | 167<br>(93·8)                   | ..       | ..         | 165<br>(93·2)                      | ..       | ..         | 63<br>(100·0)                             | ..       | ..         | ..                       |
| <i>Unlikely related</i>                                       | 11 (6·1)                        | ..       | ..         | 11 (6·2)                           | ..       | ..         | 0                                         | ..       | ..         | ..                       |
| <i>Probably related</i>                                       | 0                               | ..       | ..         | 1 (0·6)                            | ..       | ..         | 0                                         | ..       | ..         | ..                       |
| <b>SAE specification*</b>                                     |                                 |          |            |                                    |          |            |                                           |          |            |                          |
| <i>Cardiac disorder</i>                                       | 6                               | 5        | (2)        | 6                                  | 4        | (1)        | 3                                         | 3        | (3)        | 0·583                    |
| <i>Respiratory, thoracic, or<br/>    mediastinal disorder</i> | 16                              | 12       | (4)        | 12                                 | 11       | (4)        | 4                                         | 3        | (3)        | 0·856                    |
| <i>Vascular disorder</i>                                      | 10                              | 10       | (3)        | 12                                 | 9        | (3)        | 3                                         | 3        | (3)        | 0·951                    |
| <i>Surgically relevant</i>                                    | 6                               | 6        | (2)        | 10                                 | 8        | (3)        | 3                                         | 3        | (3)        | 0·835                    |
| <i>Renal or urinary disorder</i>                              | 3                               | 3        | (1)        | 2                                  | 2        | (1)        | 2                                         | 2        | (2)        | 0·553                    |
| <i>Gastrointestinal disorder</i>                              | 30                              | 24       | (8)        | 32                                 | 31       | (11)       | 14                                        | 1        | (14<br>4 ) | 0·279                    |
| <i>Surgically relevant</i>                                    | 15                              | 13       | (4)        | 17                                 | 17       | (6)        | 8                                         | 8        | (8)        | 0·419                    |
| <i>Intra-abdominal<br/>        hemorrhage/hematoma</i>        | 5                               | 5        | (2)        | 3                                  | 3        | (1)        | 4                                         | 4        | (4)        | 0·158                    |
| <i>Hepatobiliary disorder</i>                                 | 10                              | 10       | (3)        | 18                                 | 13       | (4)        | 4                                         | 4        | (4)        | 0·815                    |
| <i>Surgically relevant</i>                                    | 5                               | 5        | (2)        | 0                                  | 0        |            | 1                                         | 1        | (1)        | 0·222                    |
| <i>Infection or infestation</i>                               | 24                              | 24       | (8)        | 26                                 | 24       | (8)        | 6                                         | 6        | (6)        | 0·712                    |
| <i>Surgically relevant</i>                                    | 11                              | 11       | (4)        | 17                                 | 17       | (6)        | 5                                         | 5        | (5)        | 0·494                    |

|                                                       |    |         |    |         |    |        |       |
|-------------------------------------------------------|----|---------|----|---------|----|--------|-------|
| <i>Injury, poisoning, or procedural complications</i> | 30 | 26 (9)  | 31 | 30 (10) | 14 | 1 (3)  | 0.560 |
| <i>Surgically relevant</i>                            | 28 | 25 (9)  | 29 | 28 (9)  | 14 | 1 (3)  | 0.489 |
| <i>Anastomotic complications</i>                      | 14 | 14 (5)  | 15 | 15 (5)  | 10 | 1 (10) | 0.154 |
| <i>Wound complications</i>                            | 10 | 9 (3)   | 11 | 10 (3)  | 3  | 3 (3)  | 0.966 |
| <i>Other</i>                                          | 49 | 32 (11) | 38 | 28 (9)  | 13 | 1 (10) | 0.823 |

---

**Symbols:** &  $\chi^2$  test over all groups, unless otherwise stated; § Fisher exact test comparing all groups; \* coded with MedDRA; #

Number of SAE in the denominator

**Abbreviations:** PHX = Polyhexanide; SAE = Serious Adverse Event

**eTable 4. Clavien–Dindo classification of surgical complications (including SSI I-III) in the IOWISI trial by study group**

|                                              |                   | Treatment group |       |        |       |               |       |
|----------------------------------------------|-------------------|-----------------|-------|--------|-------|---------------|-------|
|                                              |                   | PHX             |       | Saline |       | No irrigation |       |
|                                              |                   | N               | %     | N      | %     | N             | %     |
| <b>Clavien–<br/>Dindo<br/>classification</b> | <b>Grade I</b>    | 88              | 40,4% | 84     | 35,1% | 34            | 45,3% |
|                                              | <b>Grade II</b>   | 38              | 17,4% | 36     | 15,1% | 7             | 9,3%  |
|                                              | <b>Grade IIIa</b> | 52              | 23,9% | 64     | 26,8% | 16            | 21,3% |
|                                              | <b>Grade IIIb</b> | 37              | 17,0% | 41     | 17,2% | 16            | 21,3% |
|                                              | <b>Grade IVa</b>  | 1               | 0,5%  | 3      | 1,3%  | 0             |       |
|                                              | <b>Grade IVb</b>  | 1               | 0,5%  | 4      | 1,7%  | 0             |       |
|                                              | <b>Grade V</b>    | 1               | 0,5%  | 7      | 2,9%  | 2             | 2,7%  |

**Abbreviations:** PHX = Polyhexanide
