# Supplementary material for: Intraoperative Wound Irrigation for the Prevention of Surgical Site Infection After Laparotomy: A Randomized Clinical Trial by CHIR-Net
Source: PubMed Central journal article supplement (PMC10882507; doi:10.1001/jamasurg.2023.7985), 2024-02-21
Supplement: jamasurg-e237985-s003.pdf [file jamasurg-e237985-s003.pdf]

\*Indicates required information. Only first name, last name, and suffix will appear in PubMed.

| <b>*Group Name(s): IOWISI Study Group</b> |                   |                              |                         |                                                                                                                                                                                                                                                                                                                                                                                                                                                                                 |                                                 |                                                                |                                                                                                   |
|-------------------------------------------|-------------------|------------------------------|-------------------------|---------------------------------------------------------------------------------------------------------------------------------------------------------------------------------------------------------------------------------------------------------------------------------------------------------------------------------------------------------------------------------------------------------------------------------------------------------------------------------|-------------------------------------------------|----------------------------------------------------------------|---------------------------------------------------------------------------------------------------|
| <b>*First Name and Middle Initial(s)</b>  | <b>*Last Name</b> | <b>*Suffix (eg, Jr, III)</b> | <b>Academic Degrees</b> | <b>Institution</b>                                                                                                                                                                                                                                                                                                                                                                                                                                                              | <b>Location (city, state/province, country)</b> | <b>Role or Contribution, eg, chair, principal investigator</b> | <b>Group (if more than 1 Group listed in the byline) and/or Subgroup (eg, Steering Committee)</b> |
| Edith                                     | Heimsch           |                              |                         | Münchener Studienzentrum, Technical University of Munich, School of Medicine and Health, Ismaninger Str. 22, 81675 Munich, Germany                                                                                                                                                                                                                                                                                                                                              | Munich, Germany                                 | Data Management                                                |                                                                                                   |
| Alfred                                    | Zollner           |                              |                         | Münchener Studienzentrum, Technical University of Munich, School of Medicine and Health, Ismaninger Str. 22, 81675 Munich, Germany                                                                                                                                                                                                                                                                                                                                              | Munich, Germany                                 | Safety Management                                              |                                                                                                   |
| Beate                                     | Schossow          |                              |                         | Münchener Studienzentrum, Technical University of Munich, School of Medicine and Health, Ismaninger Str. 22, 81675 Munich, Germany                                                                                                                                                                                                                                                                                                                                              | Munich, Germany                                 | Project Assistant                                              |                                                                                                   |
| Petra                                     | Wagner            |                              |                         | Münchener Studienzentrum, Technical University of Munich, School of Medicine and Health, Ismaninger Str. 22, 81675 Munich, Germany                                                                                                                                                                                                                                                                                                                                              | Munich, Germany                                 | Project Assistant                                              |                                                                                                   |
| Urula                                     | Böcher            |                              |                         | Technical University of Munich, School of Medicine and Health, Department of Surgery, Ismaninger Str. 22, 81675 Munich, Germany                                                                                                                                                                                                                                                                                                                                                 | Munich, Germany                                 | Study Nurse                                                    |                                                                                                   |
| Dorothea                                  | Dichtl            |                              |                         | Technical University of Munich, School of Medicine and Health, Department of Surgery, Ismaninger Str. 22, 81675 Munich, Germany                                                                                                                                                                                                                                                                                                                                                 | Munich, Germany                                 | Study Nurse                                                    |                                                                                                   |
| Rüdiger                                   | Göß               |                              | MD                      | Technical University of Munich, School of Medicine and Health, Department of Surgery, Ismaninger Str. 22, 81675 Munich, Germany                                                                                                                                                                                                                                                                                                                                                 | Munich, Germany                                 | Clinical Investigator                                          |                                                                                                   |
| Carmen                                    | Mota-Reyes        |                              | MD                      | Technical University of Munich, School of Medicine and Health, Department of Surgery, Ismaninger Str. 22, 81675 Munich, Germany                                                                                                                                                                                                                                                                                                                                                 | Munich, Germany                                 | Clinical Investigator                                          |                                                                                                   |
| Ilaria                                    | Pergolini         |                              | MD                      | Technical University of Munich, School of Medicine and Health, Department of Surgery, Ismaninger Str. 22, 81675 Munich, Germany                                                                                                                                                                                                                                                                                                                                                 | Munich, Germany                                 | Clinical Investigator                                          |                                                                                                   |
| Stephan                                   | Schorn            |                              | MD                      | Technical University of Munich, School of Medicine and Health, Department of Surgery, Ismaninger Str. 22, 81675 Munich, Germany                                                                                                                                                                                                                                                                                                                                                 | Munich, Germany                                 | Clinical Investigator                                          |                                                                                                   |
| Matthias                                  | Kelm              |                              | MD                      | Department of General, Visceral, Transplant, Vascular and Pediatric Surgery, University Hospital of Würzburg, 97080 Würzburg, Germany                                                                                                                                                                                                                                                                                                                                           | Wuerzburg, Germany                              | Clinical Investigator                                          |                                                                                                   |
| Franziska                                 | Köhler            |                              | MD                      | Department of General, Visceral, Transplant, Vascular and Pediatric Surgery, University Hospital of Würzburg, 97080 Würzburg, Germany                                                                                                                                                                                                                                                                                                                                           | Wuerzburg, Germany                              | Clinical Investigator                                          |                                                                                                   |
| Sophie                                    | Müller            |                              | MD                      | Department of General, Visceral, Transplant, Vascular and Pediatric Surgery, University Hospital of Würzburg, 97080 Würzburg, Germany                                                                                                                                                                                                                                                                                                                                           | Wuerzburg, Germany                              | Clinical Investigator                                          |                                                                                                   |
| Agnes                                     | Treutlein         |                              | MD                      | Department of General, Visceral, Transplant, Vascular and Pediatric Surgery, University Hospital of Würzburg, 97080 Würzburg, Germany                                                                                                                                                                                                                                                                                                                                           | Wuerzburg, Germany                              | Clinical Investigator                                          |                                                                                                   |
| Anna                                      | Widder            |                              | MD                      | Department of General, Visceral, Transplant, Vascular and Pediatric Surgery, University Hospital of Würzburg, 97080 Würzburg, Germany                                                                                                                                                                                                                                                                                                                                           | Wuerzburg, Germany                              | Clinical Investigator                                          |                                                                                                   |
| Ulrike                                    | Wulfsteiner       |                              | MD                      | Department of General, Visceral, Transplant, Vascular and Pediatric Surgery, University Hospital of Würzburg, 97080 Würzburg, Germany                                                                                                                                                                                                                                                                                                                                           | Wuerzburg, Germany                              | Clinical Investigator                                          |                                                                                                   |
| Laura Isabel                              | Hanke             |                              | MD                      | Department of General, Visceral and Transplant Surgery, University Medical Center Mainz, Langenbeckstr. 1, 55131 Mainz, Germany                                                                                                                                                                                                                                                                                                                                                 | Mainz, Germany                                  | Clinical Investigator                                          |                                                                                                   |
| Nicolas                                   | Wachter           |                              | MD                      | Department of General, Visceral and Transplant Surgery, University Medical Center Mainz, Langenbeckstr. 1, 55131 Mainz, Germany                                                                                                                                                                                                                                                                                                                                                 | Mainz, Germany                                  | Clinical Investigator                                          |                                                                                                   |
| Christian                                 | Boedecker         |                              | MD                      | Department of General, Visceral and Transplant Surgery, University Medical Center Mainz, Langenbeckstr. 1, 55131 Mainz, Germany                                                                                                                                                                                                                                                                                                                                                 | Mainz, Germany                                  | Clinical Investigator                                          |                                                                                                   |
| Elnaz                                     | Payani            |                              |                         | Department of General, Visceral and Transplantation Surgery, Ludwig Maximilians University of Munich, University Hospital, Marchioninstr. 15, 81377 Munich, Germany                                                                                                                                                                                                                                                                                                             | Munich, Germany                                 | Clinical Investigator                                          |                                                                                                   |
| Alena                                     | Sint              |                              |                         | Department of General, Visceral and Transplantation Surgery, Ludwig Maximilians University of Munich, University Hospital, Marchioninstr. 15, 81377 Munich, Germany                                                                                                                                                                                                                                                                                                             | Munich, Germany                                 | Clinical Investigator                                          |                                                                                                   |
| Nicole                                    | Trebesius         |                              |                         | Department of General, Visceral and Transplantation Surgery, Ludwig Maximilians University of Munich, University Hospital, Marchioninstr. 15, 81377 Munich, Germany                                                                                                                                                                                                                                                                                                             | Munich, Germany                                 | Clinical Investigator                                          |                                                                                                   |
| Simon                                     | Weigand           |                              |                         | Department of General, Visceral and Transplantation Surgery, Ludwig Maximilians University of Munich, University Hospital, Marchioninstr. 15, 81377 Munich, Germany                                                                                                                                                                                                                                                                                                             | Munich, Germany                                 | Clinical Investigator                                          |                                                                                                   |
| Katharina                                 | Brüwer            |                              |                         | Department of General, Visceral and Transplantation Surgery, Ludwig Maximilians University of Munich, University Hospital, Marchioninstr. 15, 81377 Munich, Germany                                                                                                                                                                                                                                                                                                             | Munich, Germany                                 | Clinical Investigator                                          |                                                                                                   |
| Barbara                                   | Maichle           |                              |                         | Clinical Study Center, Department of General, Visceral and Transplantation Surgery, Heidelberg University Hospital, Im Neuenheimer Feld 420, 69120, Heidelberg, Germany                                                                                                                                                                                                                                                                                                         | Heidelberg, Germany                             | Clinical Investigator                                          |                                                                                                   |
| Britta                                    | Knoth             |                              |                         | Clinical Study Center, Department of General, Visceral and Transplantation Surgery, Heidelberg University Hospital, Im Neuenheimer Feld 420, 69120, Heidelberg, Germany                                                                                                                                                                                                                                                                                                         | Heidelberg, Germany                             | Study Coordinator                                              |                                                                                                   |
| Katharina                                 | Hiller            |                              |                         | Clinical Study Center, Department of General, Visceral and Transplantation Surgery, Heidelberg University Hospital, Im Neuenheimer Feld 420, 69120, Heidelberg, Germany                                                                                                                                                                                                                                                                                                         | Heidelberg, Germany                             | Study Nurse                                                    |                                                                                                   |
| Tim                                       | Fahlbusch         |                              | MD                      | Department of General and Visceral Surgery, St. Josef Hospital, Ruhr University Bochum Hospitals, Gudrunstr. 56, 44791 Bochum, Germany                                                                                                                                                                                                                                                                                                                                          | Bochum, Germany                                 | Clinical Investigator                                          |                                                                                                   |
| Richard                                   | Hummel            |                              | MD                      | Department of Surgery, University Medical Center Schleswig-Holstein, Campus Lübeck, Ratzeburger Allee 160, 23538 Lübeck, Germany                                                                                                                                                                                                                                                                                                                                                | Luebeck, Germany                                | Clinical Investigator                                          |                                                                                                   |
| Ulrich                                    | Wellner           |                              | MD                      | Department of Surgery, University Medical Center Schleswig-Holstein, Campus Lübeck, Ratzeburger Allee 160, 23538 Lübeck, Germany                                                                                                                                                                                                                                                                                                                                                | Luebeck, Germany                                | Clinical Investigator                                          |                                                                                                   |
| Julia                                     | Bertram           |                              |                         |                                                                                                                                                                                                                                                                                                                                                                                                                                                                                 | Luebeck, Germany                                | Study Nurse                                                    |                                                                                                   |
| Jürgen                                    | Weitz             |                              | MD                      | Department of Visceral, Thoracic and Vascular Surgery, Faculty of Medicine and University Hospital Carl Gustav Carus, Technische Universität Dresden, Fetscherstr. 74, 01307 Dresden, Germany; & National Center for Tumor Diseases (NCT/UCC), Dresden, Germany; German Cancer Research Center (DKFZ), Heidelberg; Faculty of Medicine and University Hospital Carl Gustav Carus, Technical University of Dresden, Helmholtz Center Dresden-Rossendorf (HZDR), Dresden, Germany | Dresden, Germany                                | Clinical Investigator                                          |                                                                                                   |
| Sandra                                    | Korn              |                              | PhD                     | Department of Visceral, Thoracic and Vascular Surgery, Faculty of Medicine and University Hospital Carl Gustav Carus, Technische Universität Dresden, Fetscherstr. 74, 01307 Dresden, Germany; & National Center for Tumor Diseases (NCT/UCC), Dresden, Germany; German Cancer Research Center (DKFZ), Heidelberg; Faculty of Medicine and University Hospital Carl Gustav Carus, Technical University of Dresden, Helmholtz Center Dresden-Rossendorf (HZDR), Dresden, Germany | Dresden, Germany                                |                                                                |                                                                                                   |
| Janusz von                                | Renesse           |                              | MD                      | Department of Visceral, Thoracic and Vascular Surgery, Faculty of Medicine and University Hospital Carl Gustav Carus, Technische Universität Dresden, Fetscherstr. 74, 01307 Dresden, Germany; & National Center for Tumor Diseases (NCT/UCC), Dresden, Germany; German Cancer Research Center (DKFZ), Heidelberg; Faculty of Medicine and University Hospital Carl Gustav Carus, Technical University of Dresden, Helmholtz Center Dresden-Rossendorf (HZDR), Dresden, Germany | Dresden, Germany                                | Clinical Investigator                                          |                                                                                                   |
| Karl                                      | Karstens          |                              | MD                      | Department of General, Visceral and Thoracic Surgery, University Hospital Hamburg-Eppendorf, Martinistr. 52, 20246 Hamburg, Germany                                                                                                                                                                                                                                                                                                                                             | Hamburg, Germany                                | Clinical Investigator                                          |                                                                                                   |
| Nathaniel                                 | Melling           |                              | MD                      | Department of General, Visceral and Thoracic Surgery, University Hospital Hamburg-Eppendorf, Martinistr. 52, 20246 Hamburg, Germany                                                                                                                                                                                                                                                                                                                                             | Hamburg, Germany                                | Clinical Investigator                                          |                                                                                                   |
| Matthias                                  | Reeh              |                              | MD                      | Department of General, Visceral and Thoracic Surgery, University Hospital Hamburg-Eppendorf, Martinistr. 52, 20246 Hamburg, Germany                                                                                                                                                                                                                                                                                                                                             | Hamburg, Germany                                | Clinical Investigator                                          |                                                                                                   |
| Priska                                    | Hakenberg         |                              |                         | Department of Surgery, University Medical Center Mannheim, Medical Faculty Mannheim, Heidelberg University, Theodor-Kutzer-Ufer 1-3, 68167 Mannheim, Germany                                                                                                                                                                                                                                                                                                                    | Mannheim, Germany                               | Clinical Investigator                                          |                                                                                                   |
| Erik                                      | Rasbach           |                              |                         | Department of Surgery, University Medical Center Mannheim, Medical Faculty Mannheim, Heidelberg University, Theodor-Kutzer-Ufer 1-3, 68167 Mannheim, Germany                                                                                                                                                                                                                                                                                                                    | Mannheim, Germany                               | Clinical Investigator                                          |                                                                                                   |
| Dorothee                                  | Sturm             |                              |                         | Department of Surgery, University Medical Center Mannheim, Medical Faculty Mannheim, Heidelberg University, Theodor-Kutzer-Ufer 1-3, 68167 Mannheim, Germany                                                                                                                                                                                                                                                                                                                    | Mannheim, Germany                               | Study Coordinator                                              |                                                                                                   |

\*Indicates required information. Only first name, last name, and suffix will appear in PubMed.

| *First Name and Middle Initial(s) | *Last Name | *Suffix (eg, Jr, III) | Academic Degrees | Institution                                                                                                                                                                                   | Location (city, state/province, country) | Role or Contribution, eg, chair, principal investigator | Group (if more than 1 Group listed in the byline) and/or Subgroup (eg, Steering Committee) |
|-----------------------------------|------------|-----------------------|------------------|-----------------------------------------------------------------------------------------------------------------------------------------------------------------------------------------------|------------------------------------------|---------------------------------------------------------|--------------------------------------------------------------------------------------------|
| Hany                              | Ashmawy    |                       |                  | Department of Surgery A, General, Visceral, Thoracic, and Pediatric Surgery, University Hospital Düsseldorf and Heinrich Heine University Düsseldorf, Moorenstr. 5, 40225 Düsseldorf, Germany | Duesseldorf, Germany                     | Clinical Investigator                                   |                                                                                            |
| Levent                            | Dizdar     |                       |                  | Department of Surgery A, General, Visceral, Thoracic, and Pediatric Surgery, University Hospital Düsseldorf and Heinrich Heine University Düsseldorf, Moorenstr. 5, 40225 Düsseldorf, Germany | Duesseldorf, Germany                     | Clinical Investigator                                   |                                                                                            |
| Sascga                            | Vaghiri    |                       |                  | Department of Surgery A, General, Visceral, Thoracic, and Pediatric Surgery, University Hospital Düsseldorf and Heinrich Heine University Düsseldorf, Moorenstr. 5, 40225 Düsseldorf, Germany | Duesseldorf, Germany                     | Clinical Investigator                                   |                                                                                            |
| Benjamin                          | Albers     |                       |                  | Asklepios Clinic Langen, Department of General, Visceral and Thoracic Surgery, Röntgenstr. 20, 63225 Langen, Germany                                                                          | Langen, Germany                          | Clinical Investigator                                   |                                                                                            |
| Marcus                            | Mittag     |                       | MD               | Asklepios Clinic Langen, Department of General, Visceral and Thoracic Surgery, Röntgenstr. 20, 63225 Langen, Germany                                                                          | Langen, Germany                          | Clinical Investigator                                   |                                                                                            |
