# Supplementary material for: Intraoperative Wound Irrigation for the Prevention of Surgical Site Infection After Laparotomy: A Randomized Clinical Trial by CHIR-Net
Source: PubMed Central journal article supplement (PMC10882507; doi:10.1001/jamasurg.2023.7985), 2024-02-21
Supplement: jamasurg-e237985-s004.pdf [file jamasurg-e237985-s004.pdf]

## Data Sharing Statement

Mueller. Intraoperative Wound Irrigation for the Prevention of Surgical Site Infection After Laparotomy. *JAMA Surg*. Published February 21, 2024. doi:10.1001/jamasurg.2023.7985

### Data

**Data available:** No

### Additional Information

**Explanation for why data not available:** Data collected for the study, including individual participant data or a data dictionary, will not be made available to others. The study protocol is available, having been published in a peer-reviewed journal and in the German clinical trials register DRKS (DRKS number 00012251) ([www.drks.de](http://www.drks.de)). The results of the study are accessible in the European clinical trials register (EUDRA-CT number 2017-000152-26) (<https://www.clinicaltrialsregister.eu/ctr-search/trial/2017-000152-26/results>).
